# Supplementary material
Source: PubMed Central journal article supplement (PMC3854988)
Supplement: mmc4.pdf [file mmc4.pdf]

| <b>Primer</b> | <b>Sequence</b>           |
|---------------|---------------------------|
| cpt1b_F       | TCTAGGCAATGCCGTTAC        |
| cpt1b_R       | GAGCACATGGGCACCATAC       |
| dio2_F        | CTTCCTCCTAGATGCCTACAAAC   |
| dio2_R        | GGCATAATTGTTACCTGATTCAGG  |
| fxr_F         | TCCGGACATTCAACCATCAC      |
| fxr_R         | TCACTGCACATCCCAGATCTC     |
| g6pc_F        | CTGCAAGGGAGAACTCAGCAA     |
| g6pc_R        | GAGGACCAAGGAAGCCACAAT     |
| hk2_F         | GGAACCCAGCTGTTTGACCA      |
| hk2_R         | CAGGGGAACGAGAAGGTGAAA     |
| hnf4a_F       | ACCAAGAGGTCCATGGTGTTT     |
| hnf4a_R       | GTGCCGAGGGACGATGTAG       |
| lrh1_F        | TGGGAAGGAAGGGACAATCTT     |
| lrh1_R        | CGAGACTCAGGAGGTTGTTGAA    |
| ppia_F        | CGATGACGAGCCCTTGG         |
| ppia_R        | TCTGCTGTCTTTGGAACCTTGTGTC |
| shp_F         | CGATCCTCTTCAACCCAGATG     |
| shp_R         | AGGGCTCCAAGACTTCACACA     |
