# Supplementary material
Source: PubMed Central journal article supplement (PMC3854988)
Supplement: mmc5.pdf [file mmc5.pdf]

|                                          | <b>WT Male</b> | <b>CETP Male</b> | <b>WT Female</b> | <b>CETP Female</b> |
|------------------------------------------|----------------|------------------|------------------|--------------------|
| <b>Liver Bile Acid (nmol/g)</b>          | 109.5 ± 25.6   | 81.5 ± 47.6      | 99.9 ± 20.2      | 74.9 ± 37.2        |
| <b>Liver Cholate (AU)</b>                | ND             | ND               | 0.74 ± 0.36      | 1.27 ± 0.39 †      |
| <b>Liver Taurocholate (AU)</b>           | ND             | ND               | 0.88 ± 0.27      | 1.08 ± 0.44 †      |
| <b>Liver Glycocholate (AU)</b>           | ND             | ND               | 0.84 ± 0.17      | 1.41 ± 1.10 †      |
| <b>Liver Taurochenodeoxycholate (AU)</b> | ND             | ND               | 0.85 ± 0.32      | 1.15 ± 0.46 †      |
| <b>Liver Beta-Muricholate (AU)</b>       | ND             | ND               | 1.00 ± 0.04      | 1.07 ± 0.37 †      |
| <b>Liver Tauro-Beta-Muricholate (AU)</b> | ND             | ND               | 1.23 ± 0.36      | 1.11 ± 0.69 †      |
| <b>Liver Taurosodeoxycholate (AU)</b>    | ND             | ND               | 1.03 ± 0.14      | 1.32 ± 0.85 †      |
| <b>Serum Bile acid (nmol/mL)</b>         | 10.72 ± 5.80   | 21.9 ± 25.3      | 12.6 ± 12.2      | 37.7 ± 48.6        |
| <b>Serum Cholate (AU)</b>                | ND             | ND               | 1.26 ± 1.08      | 2.37 ± 2.49        |
| <b>Serum 1,2 Dehydrocholate (AU)</b>     | ND             | ND               | 0.68 ± 0.41      | 1.48 ± 1.41        |
| <b>Serum Beta-Muricholate (AU)</b>       | ND             | ND               | 1.21 ± 0.87      | 2.01 ± 1.91        |
